# Supplementary material
Source: bioRxiv or medRxiv preprint supplement (https://medrxiv.org/highwire/filestream/87417/field_highwire_adjunct_files/0/2020.06.25.20139717-1.pdf)
Supplement: Supplementary file [file 2020.06.25.20139717-1.pdf]

# 1. Diagnostic test and epidemiological parameters used for scenario analysis and sensitivity analysis

Table 1 Diagnostic test and epidemiological parameters used for model and sensitivity analysis

| <b>Epidemiological parameters</b>                | Baseline | Sensitivity analysis |         |        |
|--------------------------------------------------|----------|----------------------|---------|--------|
| Population screened per year per team (n)        | 66,000   | 54,000               | 72,000  | (1)    |
| HAT prevalence (%)                               | 0.011%   | 0.005%               | 0.030%  | (1)    |
|                                                  |          |                      |         |        |
| <b>Diagnostic parameters</b>                     |          |                      |         |        |
| Specificity CATT                                 |          | 0.835                | 0.993   | (2, 3) |
| Sensitivity CATT                                 | 0.953    |                      |         | (2, 3) |
| Specificity RDT SD Bioline HAT                   | 0.879    |                      |         | (4)    |
| Sensitivity RDT SD Bioline HAT                   | 0.996    |                      |         | (4)    |
| Specificity RDT HAT Sero-K-Set                   | 0.883    |                      |         | (4)    |
| Sensitivity RDT HAT Sero-K-Set                   | 0.991    |                      |         | (4)    |
| Sensitivity algorithm PG-CTC-mAECT               | 0.903    |                      |         | (5)    |
| Sensitivity algorithm PG-mAECT                   | 0.802    |                      |         | (5)    |
|                                                  |          |                      |         |        |
| <b>Cost parameters</b>                           |          |                      |         |        |
| Vehicle/Motorecycle use life                     | 7y/5.6y  | 3y/2y                | 10y/10y | (6)    |
| Cost mAECT (US\$)                                | 4,13     | 0                    | 8.26    |        |
| Fuel Cost (75% - 150%)                           | 100%     | 75%                  | 150%    |        |
| Discount rate                                    | 3%       | 0%                   | 5%      |        |
|                                                  |          |                      |         |        |
| <b>Characteristics of mobile teams</b>           |          |                      |         |        |
| % of HAT suspects who are microscopically tested | 100      |                      |         | (1)    |

## References:

1. Programme national de lutte contre la trypanosomiase humaine africaine en DRC (PNLTHA). TrypElim Yasa Bonga & Mosango project results [Trimestral Reports]. Kinshasa: PNLTHA; 2017 - 2018.
2. Noireau F, Gouteux JP, Duteurtre JP. Valeur diagnostique du test d'agglutination sur carte (Testryp CATT) dans le dépistage de masse de la trypanosomiase humaine au Congo. Bulletin de la société de pathologie exotique. 1987;80(5):797-803, [http://horizon.documentation.ird.fr/exl-doc/pleins\\_textes/pleins\\_textes\\_5/b\\_fdi\\_18-19/25548.pdf](http://horizon.documentation.ird.fr/exl-doc/pleins_textes/pleins_textes_5/b_fdi_18-19/25548.pdf)
3. Mitashi P, Hasker E, Lejon V, Kande V, Muyembe J-J, Lutumba P, et al. Human african trypanosomiasis diagnosis in first-line health services of endemic countries, a systematic review. PLoS Neglected Tropical Diseases. 2012;6(11):e1919-e.doi:10.1371/journal.pntd.0001919
4. Jamonneau V, Camara O, Ilboudo H, Peylhard M, Koffi M, Sakande H, et al. Accuracy of individual rapid tests for serodiagnosis of gambiense sleeping sickness in West Africa. PLoS Neglected Tropical Diseases. 2015;9(2):e0003480-e.doi:10.1371/journal.pntd.0003480
5. Lutumba P, Robays J, Miaka C, Kande V, Mumba D, Buscher P, et al. Validity, cost and feasibility of the mAECT and CTC confirmation tests after diagnosis of African of sleeping sickness. Tropical Medicine & International Health. 2006;11(4):470-8.doi:10.1111/j.1365-3156.2006.01591.x
6. World Health Organization (WHO). CHOosing Interventions that are Cost Effective (WHO-CHOICE): Table 4: Capital Item - Useful Lives Reported by Country Experts [Internet]. Geneva: WHO. Updated [Cited Available from: [https://www.who.int/choice/costs/prices\\_t4/en/](https://www.who.int/choice/costs/prices_t4/en/)]

## 2. Economic costs

The annual cost per item was based the invoices for replacement equipment in 2017 – 2018, observations, training budgets and past training expenses, discussions with PNLTHA experts, PNLTHA procurement registers and WHO Choice guidelines for the useful lives of capital items.

Table 2 Details capital equipment

| Category                   | Description                         | Strategy | Cost Excl VAT | Average useful life | Annual cost - Discounted |          |          | Traditional team |          |          | Mini team |   |          |          |          |
|----------------------------|-------------------------------------|----------|---------------|---------------------|--------------------------|----------|----------|------------------|----------|----------|-----------|---|----------|----------|----------|
|                            |                                     |          |               |                     | 0%                       | 3%       | 5%       | #                | 0%       | 3%       | 5%        | # | 0%       | 3%       | 5%       |
| Vehicles                   | Toyota Land Cruiser 78 - 13 places  | RDT&CATT | 38,740 \$     | 7                   | 5,534 \$                 | 5,073 \$ | 4,803 \$ | 1                | 5,534 \$ | 5,073 \$ | 4,803 \$  | - | 0 \$     | 0 \$     | 0 \$     |
| Vehicles                   | 4 Motorcycles - Yamaha AG 200       | RDT&CATT | 5,950 \$      | 6                   | 1,050 \$                 | 1,034 \$ | 988 \$   | -                | 0 \$     | 0 \$     | 0 \$      | 4 | 4,200 \$ | 4,136 \$ | 3,950 \$ |
| Medical and laboratory eq. | Rotator                             | CATT     | 609 \$        | 2                   | 304 \$                   | 300 \$   | 297 \$   | 2                | 609 \$   | 600 \$   | 594 \$    | 3 | 913 \$   | 900 \$   | 891 \$   |
| Medical and laboratory eq. | Microscope incl. accessories - 12V  | RDT&CATT | 843 \$        | 5                   | 169 \$                   | 159 \$   | 153 \$   | -                | 0 \$     | 0 \$     | 0 \$      | 1 | 169 \$   | 159 \$   | 153 \$   |
| Medical and laboratory eq. | Microscope incl. accessories - 220V | RDT&CATT | 1,001 \$      | 5                   | 200 \$                   | 189 \$   | 182 \$   | 2                | 400 \$   | 378 \$   | 364 \$    | - | 0 \$     | 0 \$     | 0 \$     |
| Medical and laboratory eq. | Haematocrit centrifuge              | RDT&CATT | 877 \$        | 2                   | 438 \$                   | 432 \$   | 428 \$   | 1                | 438 \$   | 432 \$   | 428 \$    | - | 0 \$     | 0 \$     | 0 \$     |
| Medical and laboratory eq. | Centrifuge - 220V                   | RDT&CATT | 337 \$        | 2                   | 169 \$                   | 166 \$   | 165 \$   | 1                | 169 \$   | 166 \$   | 165 \$    | - | 0 \$     | 0 \$     | 0 \$     |
| Medical and laboratory eq. | Centrifuge - 12V                    | RDT&CATT | 179 \$        | 2                   | 90 \$                    | 88 \$    | 88 \$    | -                | 0 \$     | 0 \$     | 0 \$      | 1 | 90 \$    | 88 \$    | 88 \$    |
| Medical and laboratory eq. | Micropipette                        | RDT&CATT | 374 \$        | 2                   | 187 \$                   | 184 \$   | 183 \$   | 2                | 374 \$   | 369 \$   | 365 \$    | - | 0 \$     | 0 \$     | 0 \$     |
| Electronics                | Laptop                              | RDT&CATT | 1,200 \$      | 5.4                 | 222 \$                   | 208 \$   | 200 \$   | 1                | 222 \$   | 208 \$   | 200 \$    | - | 0 \$     | 0 \$     | 0 \$     |
| Electronics                | PDA & camera incl. accessories      | RDT&CATT | 798 \$        | 5.4                 | 148 \$                   | 139 \$   | 133 \$   | 3                | 443 \$   | 416 \$   | 399 \$    | 4 | 591 \$   | 554 \$   | 532 \$   |
| Energy source              | Generator incl. accessories         | RDT&CATT | 1,821 \$      | 5                   | 364 \$                   | 344 \$   | 331 \$   | 1                | 364 \$   | 344 \$   | 331 \$    | - | 0 \$     | 0 \$     | 0 \$     |
| Energy source              | Solar panel incl. accessories       | RDT&CATT | 323 \$        | 3                   | 108 \$                   | 105 \$   | 103 \$   | -                | 0 \$     | 0 \$     | 0 \$      | 4 | 431 \$   | 419 \$   | 411 \$   |
| Other equipment            | Tents                               | RDT&CATT | 1,836 \$      | 4                   | 459 \$                   | 439 \$   | 427 \$   | 1                | 459 \$   | 439 \$   | 427 \$    | - | 0 \$     | 0 \$     | 0 \$     |
| Other equipment            | Camping beds                        | RDT&CATT | 47 \$         | 3                   | 16 \$                    | 15 \$    | 15 \$    | 6                | 93 \$    | 90 \$    | 89 \$     | 4 | 62 \$    | 60 \$    | 59 \$    |
| Other equipment            | Miscellaneous                       | RDT&CATT | 900 \$        | 2                   | 450 \$                   | 443 \$   | 439 \$   | 1                | 450 \$   | 443 \$   | 439 \$    | 1 | 450 \$   | 443 \$   | 439 \$   |
| Training                   | Training                            | RDT&CATT | 3,700 \$      | 2                   | 1,850 \$                 | 1,823 \$ | 1,806 \$ | 1                | 1,850 \$ | 1,823 \$ | 1,806 \$  | 1 | 1,850 \$ | 1,823 \$ | 1,806 \$ |

Table 3 Overview capital equipment

| Summary                                |                                                    | Traditional team |                  |                  | Mini team       |                 |                 |
|----------------------------------------|----------------------------------------------------|------------------|------------------|------------------|-----------------|-----------------|-----------------|
| Type                                   | Category                                           | 0%               | 3%               | 5%               | 0%              | 3%              | 5%              |
| Capital Equipment                      | Vehicles                                           | 5,543 \$         | 5,073 \$         | 4,803 \$         | 4,200 \$        | 4,136 \$        | 3,950 \$        |
| Capital Equipment                      | Medical and laboratory eq.                         | 1,990 \$         | 1,944 \$         | 1,916 \$         | 1,171 \$        | 1,147 \$        | 1,132 \$        |
| Capital Equipment                      | Energy source                                      | 364 \$           | 344 \$           | 331 \$           | 431 \$          | 419 \$          | 411 \$          |
| Capital Equipment                      | Electronics                                        | 666 \$           | 624 \$           | 599 \$           | 591 \$          | 554 \$          | 532 \$          |
| Capital Equipment                      | Other equipment                                    | 1,002 \$         | 973 \$           | 955 \$           | 512 \$          | 504 \$          | 498 \$          |
| Capital Equipment                      | Training                                           | 1,850 \$         | 1,823 \$         | 1,806 \$         | 1,850 \$        | 1,823 \$        | 1,806 \$        |
| <b>Total Equipment team using CATT</b> |                                                    | <b>11,406 \$</b> | <b>10,782 \$</b> | <b>10,411 \$</b> | <b>8,756 \$</b> | <b>8,582 \$</b> | <b>8,330 \$</b> |
| Capital Equipment                      | Medical and laboratory eq. Excluding CATT rotators | - 609 \$         | - 600 \$         | - 594 \$         | -913 \$         | - 900 \$        | - 891 \$        |
| <b>Total Equipment team using RDT</b>  |                                                    | <b>10,798 \$</b> | <b>10,182 \$</b> | <b>9,817 \$</b>  | <b>7,843 \$</b> | <b>7,683 \$</b> | <b>7,438 \$</b> |

Table 4 Details estimation cost consumables per test

The cost per test was based on the observations regarding the consumables used during screening activities and market prices during the project.

| Description                                      | Packaging | # Units/packaging | Price | Currency | Unit price Excl VAT | Imported | Unit price @ Kinshasa | Non-specific Annual consumption | CATT | Lymph node aspiration | Blood sample | CTC | meat | Lumbar puncture examination | CATT titration | RDT SD | RDT Sero -K- |
|--------------------------------------------------|-----------|-------------------|-------|----------|---------------------|----------|-----------------------|---------------------------------|------|-----------------------|--------------|-----|------|-----------------------------|----------------|--------|--------------|
| <b>The average number of items used per test</b> |           |                   |       |          |                     |          |                       |                                 |      |                       |              |     |      |                             |                |        |              |
| Cotton balls                                     | Roll      | 1                 | 7.00  | \$       | \$ 7.00             |          | \$ 7.00               | 36                              |      |                       |              |     |      |                             |                |        |              |
| Providone - Disinfectant                         | 250 ml    | 1                 | 5.00  | \$       | \$ 5.00             |          | \$ 5.00               | 36                              |      |                       |              |     |      |                             |                |        |              |
| Gloves                                           | Box       | 100               | 7.00  | \$       | \$ 0.07             |          | \$ 0.07               | 3,000                           |      |                       |              |     |      |                             |                |        |              |
| Bin                                              | Piece     | 1                 | 20.00 | \$       | \$ 20.00            |          | \$ 20.00              | 36                              |      |                       |              |     |      |                             |                |        |              |
| Kit CATT                                         | Kit CATT  | 1                 | 0.52  | Euro     | \$ 0.61             | x        | \$ 0.67               |                                 | 1    |                       |              |     |      |                             | 5              |        |              |
| Lancet                                           | Box       | 200               | 3.10  | Euro     | \$ 0.02             | x        | \$ 0.02               |                                 | 1    |                       |              |     |      |                             |                |        |              |
| Heparinized capillary tubes                      | Box       | 100               | 3.03  | Euro     | \$ 0.04             | x        | \$ 0.04               |                                 | 1    |                       | 1            |     |      |                             |                |        |              |
| Bulb for capillary tubes                         | Box       | 100               | 1.42  | Euro     | \$ 0.02             | x        | \$ 0.02               |                                 | 0.5  |                       |              |     |      |                             |                |        |              |
| hypodermic needle                                | Box       | 100               | 8.00  | \$       | \$ 0.08             |          | \$ 0.08               |                                 |      | 1                     |              |     |      |                             |                |        |              |
| Syringe 5cc                                      | Box       | 100               | 7.00  | \$       | \$ 0.07             |          | \$ 0.07               |                                 |      | 1                     |              |     |      | 1                           |                |        |              |
| Tropicalized microscope slide                    | Box       | 50                | 4.00  | \$       | \$ 0.08             |          | \$ 0.08               |                                 |      | 1                     |              | 1   |      |                             |                |        |              |
| Cover glass                                      | Box       | 100               | 2.00  | \$       | \$ 0.02             |          | \$ 0.02               |                                 |      | 1                     |              |     |      |                             |                |        |              |
| Gauze                                            | Box       | 10                | 3.50  | \$       | \$ 0.35             |          | \$ 0.35               |                                 |      |                       | 0.5          |     |      |                             |                |        |              |
| Adapter vacutainer Tubes                         | Box       | 1                 | 0.50  | \$       | \$ 0.50             |          | \$ 0.50               |                                 |      |                       | 0.5          |     |      |                             |                |        |              |
| Vacutainer needle                                | Box       | 1                 | 0.50  | \$       | \$ 0.50             |          | \$ 0.50               |                                 |      |                       | 1            |     |      |                             |                |        |              |
| Heparinized vacutainer tubes                     | Box       | 100               | 35.00 | \$       | \$ 0.35             |          | \$ 0.35               |                                 |      |                       | 1            |     |      |                             |                |        |              |
| Plasticine                                       | Sheet     | 6                 | 30.00 | \$       | \$ 5.00             |          | \$ 5.00               |                                 |      |                       | 0.03         |     |      |                             |                |        |              |
| Specialized cover glass                          | Box       | 10                | 15.00 | \$       | \$ 1.50             |          | \$ 1.50               |                                 |      |                       | 1            |     |      | 1                           |                |        |              |
| Kit mAECT                                        | Box       | 1                 | 3.50  | Euro     | \$ 4.13             |          | \$ 4.13               |                                 |      |                       |              |     | 1    |                             |                |        |              |
| Lumbar puncture needle                           | Piece     | 1                 | 1.30  | \$       | \$ 1.30             |          | \$ 1.30               |                                 |      |                       |              |     |      | 1                           |                |        |              |
| Modified single centrifugation kit               | Kit       | 1                 | 10.00 | Euro     | \$ 11.80            |          | \$ 11.80              |                                 |      |                       |              |     |      | 1                           |                |        |              |
| Collector tube mAECT                             | Box       | 1                 | 3.50  | Euro     | \$ 4.13             |          | \$ 4.13               |                                 |      |                       |              |     |      | 1                           |                |        |              |
| Pipette                                          | Box       | 500               | 45.00 | \$       | \$ 0.09             |          | \$ 0.09               |                                 |      |                       |              |     |      | 1                           | 1              |        |              |
| Tips                                             | Box       | 500               | 4.24  | Euro     | \$ 0.01             | x        | \$ 0.01               |                                 |      |                       |              |     |      |                             | 1              |        |              |
| Microtitration tray                              | Box       | 50                | 20.01 | Euro     | \$ 0.47             | x        | \$ 0.52               |                                 |      |                       |              |     |      |                             | 0.08           |        |              |
| RDT SD Bioline HAT                               | Box       | 25                | 13.70 | \$       | \$ 0.55             | x        | \$ 0.60               |                                 |      |                       |              |     |      |                             |                |        | 1            |
| RDT HAT Sero-K-Set                               | Box       | 40                | 60.8  | Euro     | \$ 1,79             | X        | \$ 1.97               |                                 |      |                       |              |     |      |                             |                |        |              |

Transport Europe - RDC: + 10% Based on estimation - ITM exports 2017  
 Exchange rate euro - \$ 1.180 Average exchange rate of 2018

Table 5 Total cost supplies and material per test

| Test                                                   | Price subsidized |
|--------------------------------------------------------|------------------|
| Non-specific => All CATT or RDT                        | \$ 0.02          |
| CATT                                                   | \$ 0.74          |
| Lymph node aspiration (LNA)                            | \$ 0.25          |
| Blood sample (BS) => To be taken Once for CTC or mAECT | \$ 1.28          |
| CTC                                                    | \$ 1.77          |
| mAECT                                                  | \$ 4.13          |
| Lumbar puncture examination (LP)                       | \$ 18.89         |
| CATT titration                                         | \$ 3.52          |
| RDT SD Bioline HAT                                     | \$ 0.60          |
| RDT HAT Sero-K-Set                                     | \$ 1.97          |

Table 6 Total number of tests performed per team

| Type of team                    | CATT          | CATT +     | LNA       | CTC        | mEACT      | HAT stage 1 | HAT stage 2 |
|---------------------------------|---------------|------------|-----------|------------|------------|-------------|-------------|
| Traditional Mobile Team         | 65,190        | 276 (0,4%) | 17        | 220        | 271        | 4           | 7           |
| Average Mini Mobile Teams       | 66,480        | 833 (1%)   | 137       | -          | 795        | 2           | 4           |
| Mini Mobile Team 1              | 67,715        | 839        | 242       | -          | 811        | 1           | 1           |
| Mini Mobile Team 2              | 61,958        | 806        | 60        | -          | 772        | 5           | 10          |
| Mini Mobile Team 3              | 69,767        | 855        | 108       | -          | 801        |             |             |
| <b>Average all Mobile Teams</b> | <b>65,835</b> | <b>555</b> | <b>77</b> | <b>110</b> | <b>533</b> | <b>3</b>    | <b>5</b>    |

Table 7 % of tests discarded per team

| Test                | Traditional Team | Mini Team |
|---------------------|------------------|-----------|
| % of CATT discarded | 7.5%             | 15%       |

Table 8 Annual recurrent costs for HAT screening & Parasitological confirmation

| Category                      | Description               | Screening | Cost excl VAT | Traditional Team |           | Mini Team |            |
|-------------------------------|---------------------------|-----------|---------------|------------------|-----------|-----------|------------|
|                               |                           |           |               | #                | Cost      | #         | Cost       |
| <b>Annual Recurrent costs</b> |                           |           |               |                  |           |           |            |
| Screening                     | CATT & non-specific costs | CATT      | 0.77 \$       | 65,190           | 49,952 \$ | 66,480    | 50,940 \$  |
| Screening                     | CATT discarded            | CATT      | 0.74 \$       | 4,889            | 3,635 \$  | 9,972     | 7,415 \$   |
| Parasitological confirmation  | LNA                       | CATT      | 0.25 \$       | 17               | 4 \$      | 137       | 34 \$      |
| Parasitological confirmation  | Blood sample              | CATT      | 1.28 \$       | 220              | 280 \$    | 795       | 1,013 \$   |
| Parasitological confirmation  | CTC                       | CATT      | 1.77 \$       | 220              | 389 \$    |           | 0 \$       |
| Parasitological confirmation  | mAECT                     | CATT      | 4.13 \$       | 271              | 1,119 \$  | 795       | 3,282 \$   |
| Staging                       | LP                        | CATT      | 18.89 \$      | 11               | 208 \$    |           | 0 \$       |
| Surveillance                  | CATT titration            | CATT      | 3.52 \$       | 265              | 932 \$    | -         | 0 \$       |
|                               |                           |           |               |                  | 56,521 \$ |           | 62,6284 \$ |

Exchange rate euro - \$

1.180 Average exchange rate of 2018

Table 9 Total annual recurrent costs for HAT screening & Parasitological confirmation per test

| Summary                |                              | Traditional team | Mini team |
|------------------------|------------------------------|------------------|-----------|
| Type                   | Category                     | Cost             | Cost      |
| Annual Recurrent costs | Screening                    | 53,587 \$        | 58,355 \$ |
| Annual Recurrent costs | Parasitological confirmation | 1,793 \$         | 4,329 \$  |
| Annual Recurrent costs | Staging                      | 208 \$           | 0 \$      |
| Annual Recurrent costs | Surveillance                 | 932 \$           | 0 \$      |
|                        |                              | 56,521 \$        | 62,684 \$ |

Table 10 Total annual recurrent costs - HR

The annual cost per item was based on the invoices, monthly wage statements, discussions with PNLTHA experts and PNLTHA procurement registers.

| Category | Description                         | Screening | Traditional Team | Mini Team |
|----------|-------------------------------------|-----------|------------------|-----------|
| HR       | Salaries & subsidies                | RDT&CATT  | 2,886 \$         | 1,066 \$  |
| HR       | Fixed premium                       | RDT&CATT  | 11,460 \$        | 11,816 \$ |
| HR       | Variable premium                    | RDT&CATT  | 16,728 \$        | 4,536 \$  |
| HR       | Allowance local health care workers | RDT&CATT  | 0 \$             | 3,475 \$  |

Exchange rate euro - \$ 1.180 Average exchange rate of 2018

| Summary                |          | Traditional team | Mini team |
|------------------------|----------|------------------|-----------|
| Type                   | Category | Average          | Average   |
| Annual Recurrent costs | HR       | 31,074 \$        | 20,892 \$ |

Table 11 Total Annual recurrent costs – Other supplies and materials

The annual cost per item was based on the invoices, monthly wage statements, discussions with PNLTHA experts and PNLTHA procurement registers.

| Category                         | Description                      | Screening | Cost excl VAT | Traditional Team |          | Mini Team |          |
|----------------------------------|----------------------------------|-----------|---------------|------------------|----------|-----------|----------|
|                                  |                                  |           |               | #                | Average  | #         | Average  |
| <b>Annual Recurrent costs</b>    |                                  |           |               |                  |          |           |          |
| Operation & maintenance vehicles | Tires, batterie, insurance, etc. | RDT&CATT  | 1,225 \$      | 1                | 1,225 \$ | 1         | 1,225 \$ |
| Operation & maintenance vehicles | Maintenance                      | RDT&CATT  | 2,000 \$      | 1                | 2,000 \$ | 1         | 1,000 \$ |
| Medical and laboratory eq.       | Other lab supplies and material  | RDT&CATT  | 500 \$        | 1                | 500 \$   | 1         | 500 \$   |
| Energy source                    | Batteries incl. accessories      | RDT&CATT  | 250 \$        | 1                | 250 \$   | 4         | 1,000 \$ |
| Other equipment and consumables  | Other Camping Equipment          | RDT&CATT  | 80 \$         | 8                | 640 \$   | 4         | 320 \$   |
| Other equipment and consumables  | Other operational costs          | RDT&CATT  | 1,000 \$      | 1                | 1,000 \$ | 1         | 1,000 \$ |

Exchange rate euro - \$ 1.180 Average exchange rate of 2018

| Summary                |                                  | Traditional team | Mini team |
|------------------------|----------------------------------|------------------|-----------|
| Type                   | Category                         | Average          | Average   |
| Annual Recurrent costs | Operation & maintenance vehicles | 3,225 \$         | 2,225 \$  |
| Annual Recurrent costs | Medical and laboratory eq.       | 500 \$           | 500 \$    |
| Annual Recurrent costs | Energy source                    | 250 \$           | 1,000 \$  |
| Annual Recurrent costs | Other equipment and consumables  | 1,640 \$         | 1,320 \$  |
| Annual Recurrent costs | Other Supplies and materials     | 5,615 \$         | 5,045 \$  |

Table 12 Total Annual recurrent costs – Fuel

The average fuel cost was estimated through trimestral reports of mobile teams, car and motorcycle logbooks, fuel invoices. The fuel price range for the DRC was based on invoices and discussions with PNLTHA.

|                                | Traditional team |                                  | Mini team       |
|--------------------------------|------------------|----------------------------------|-----------------|
| Consumption - l/ 100 km        | 27               | Consumption - l/ 100 km          | 8               |
| Number of KM - Screening       | 5,179            | Number of KM - Screening         | 17,306          |
| Number of KM - Coordination    | 5,482            | Number of KM - Coordination      | -               |
| Number of KM - Monitoring      | 1,644            | Number of KM - Monitoring        | 651             |
| Annual consumption vehicle (l) | 3,322            | Annual consumption mini team (l) | 1,437           |
| Annual consumption generator   | 252              | Annual consumption generator     |                 |
| Price diesel - l               | 1.6 \$           | Price diesel - l                 | 1.6 \$          |
| <b>Total fuel cost</b>         | <b>5,719 \$</b>  | <b>Total fuel cost</b>           | <b>2,299 \$</b> |

| Summary                |           | Traditional team | Mini team |
|------------------------|-----------|------------------|-----------|
| Type                   | Category  | Average          | Average   |
| Annual Recurrent costs | Fuel cost | 5,719 \$         | 2,299 \$  |

Table 13 Total Annual recurrent costs – Management costs

The estimation of PNLTHA’s direct management costs was based on the PNLTHA budgets and discussions with the PNLTHA.

| Provincial Level - PNLTHA                                                | Unit price | Units | Annual cost | Cost per mobile team | Source of information                                                                                                                                                                            |
|--------------------------------------------------------------------------|------------|-------|-------------|----------------------|--------------------------------------------------------------------------------------------------------------------------------------------------------------------------------------------------|
| <b>Management provincial coordination PNLTHA</b>                         |            |       |             | <b>3,398 \$</b>      | 5% Annual cost                                                                                                                                                                                   |
| Coordinations - Investments cars                                         | 39,500 \$  | 0     | 5,411 \$    | 271 \$               | Estimation annual costs based on interviews and budget PNLTHA<br>The provincial coordination spends around 70% of their time on the management of active screening activities in 15 health zones |
| Provincial coordinator                                                   | 1,000 \$   | 1     | 12,000 \$   | 600 \$               |                                                                                                                                                                                                  |
| Supervisor                                                               | 600 \$     | 1     | 7,200 \$    | 360 \$               |                                                                                                                                                                                                  |
| Administrator                                                            | 450 \$     | 1     | 5,400 \$    | 270 \$               |                                                                                                                                                                                                  |
| Data manager                                                             | 300 \$     | 1     | 3,600 \$    | 180 \$               |                                                                                                                                                                                                  |
| Logistics                                                                | 450 \$     | 1     | 5,400 \$    | 270 \$               |                                                                                                                                                                                                  |
| Chauffeur                                                                | 300 \$     | 1     | 3,600 \$    | 180 \$               |                                                                                                                                                                                                  |
| Surveillant                                                              | 150 \$     | 4     | 7,200 \$    | 360 \$               |                                                                                                                                                                                                  |
| Christmas bonus                                                          | 100 \$     | 10    | 1,000 \$    | 50 \$                |                                                                                                                                                                                                  |
| Working cost - office supplies - 1 650 \$/trimester                      | 1,650 \$   | 4     | 6,600 \$    | 330 \$               |                                                                                                                                                                                                  |
| Communication - 100\$/month                                              | 100 \$     | 12    | 1,200 \$    | 60 \$                |                                                                                                                                                                                                  |
| Internet - 55 \$                                                         | 300 \$     | 12    | 3,600 \$    | 180 \$               |                                                                                                                                                                                                  |
| Maintenance car, new tires, etc.- 750\$/Trim                             | 750 \$     | 4     | 3,000 \$    | 150 \$               |                                                                                                                                                                                                  |
| Installation cost                                                        | 11,000 \$  | 25%   | 2,750 \$    | 138 \$               |                                                                                                                                                                                                  |
| <b>Annual planning meeting at Provincial level (ECP, ECZS, UM)</b>       |            |       |             | <b>674 \$</b>        |                                                                                                                                                                                                  |
| Transport                                                                | 2,750 \$   | 1     | 2,750 \$    | 138 \$               |                                                                                                                                                                                                  |
| Meeting room, Hotel, lunch                                               | 6,600 \$   | 1     | 6,600 \$    | 330 \$               |                                                                                                                                                                                                  |
| Per Diem                                                                 | 3,575 \$   | 1     | 3,575 \$    | 179 \$               |                                                                                                                                                                                                  |
| Miscellaneous                                                            | 550 \$     | 1     | 550 \$      | 28 \$                |                                                                                                                                                                                                  |
| <b>Provincial Level: 1 supervision/trimester - 2 people - 5 days</b>     |            |       |             | <b>2,235 \$</b>      | Total cost 4 visits annually                                                                                                                                                                     |
| Fuel -21l/100km - 470km + 300km return Kikwit- Health zone               | 2 \$       | 647   | 1,035 \$    | 1,035 \$             | Estimation annual costs based on interviews and budget PNLTHA<br>1 visit per trimester per health zone                                                                                           |
| Per diem - 2 people - 6 days                                             | 10 \$      | 40    | 400 \$      | 400 \$               |                                                                                                                                                                                                  |
| Lodging - 2 people - 5 nights                                            | 20 \$      | 40    | 800 \$      | 800 \$               |                                                                                                                                                                                                  |
| <b>Total Provincial Level PNLTHA: Management &amp; Supervision</b>       |            |       |             | <b>6,307 \$</b>      |                                                                                                                                                                                                  |
| Management central level PNLTHA                                          | Unit price | Units | Annual cost | Cost per mobile team | Source of information                                                                                                                                                                            |
| <b>Management</b>                                                        |            |       |             | <b>795 \$</b>        | <b>2.5% of annual cost</b>                                                                                                                                                                       |
| Coordinator                                                              | 2,000 \$   | 1     | 12,000 \$   | 300 \$               | Estimation annual costs based on interviews and budget PNLTHA<br>Project specific management team at central level that divides their time over 2 coordinations                                  |
| Data management                                                          | 550 \$     | 1     | 6,600 \$    | 165 \$               |                                                                                                                                                                                                  |
| Lab supervisor                                                           | 1,000 \$   | 1     | 6,000 \$    | 150 \$               |                                                                                                                                                                                                  |
| Financial manager                                                        | 1,000 \$   | 0     | 3,600 \$    | 90 \$                |                                                                                                                                                                                                  |
| Logistics assistant                                                      | 1,000 \$   | 0     | 3,600 \$    | 90 \$                |                                                                                                                                                                                                  |
| <b>National Level: 1 supervision every trimester - 3 people - 5 days</b> |            |       |             | <b>859 \$</b>        | <b>5% of annual cost</b>                                                                                                                                                                         |
| Travel costs                                                             | 2,000 \$   | 4     | 8,000 \$    | 400 \$               | Estimation annual costs based on interviews and budget PNLTHA; 1 visit per trimester per coordination                                                                                            |
| Per diem - 2 people - 9 days                                             | 85 \$      | 108   | 9,180 \$    | 459 \$               |                                                                                                                                                                                                  |
| <b>Total national Level PNLTHA: Management &amp; Supervision</b>         |            |       |             | <b>1,654 \$</b>      |                                                                                                                                                                                                  |
| <b>Total Management cost</b>                                             |            |       |             | <b>7,961 \$</b>      |                                                                                                                                                                                                  |

| Summary                |            | Traditional team    | Mini team          |
|------------------------|------------|---------------------|--------------------|
| Type                   | Category   | Average             | Average            |
| Annual Recurrent costs | Management | 7,691 \$            | 7,691 \$           |
| Annual Recurrent costs | Management | + 15% overall costs | +15% overall costs |





|                                       |                   |                   |                   |                   |                   |                   |                   |                   |                   |                   |                   |                   |                   |                   |                   |
|---------------------------------------|-------------------|-------------------|-------------------|-------------------|-------------------|-------------------|-------------------|-------------------|-------------------|-------------------|-------------------|-------------------|-------------------|-------------------|-------------------|
| Lab & medical supplies - Surveillance | 0 \$              | 0 \$              | 0 \$              | 0 \$              | 0 \$              | 0 \$              | 0 \$              | 0 \$              | 0 \$              | 0 \$              | 0 \$              | 0 \$              | 0 \$              | 0 \$              | 0 \$              |
| Human Resources                       | 20,892 \$         | 20,892 \$         | 20,892 \$         | 20,892 \$         | 20,892 \$         | 20,892 \$         | 20,892 \$         | 20,892 \$         | 20,892 \$         | 20,892 \$         | 20,892 \$         | 20,892 \$         | 20,892 \$         | 20,892 \$         | 20,892 \$         |
| Other supplies and materials          | 5,045 \$          | 5,045 \$          | 5,045 \$          | 5,045 \$          | 5,045 \$          | 5,045 \$          | 5,045 \$          | 5,045 \$          | 5,045 \$          | 5,045 \$          | 5,045 \$          | 5,045 \$          | 5,045 \$          | 5,045 \$          | 5,045 \$          |
| Fuel cost                             | 2,299 \$          | 2,299 \$          | 2,299 \$          | 2,299 \$          | 2,299 \$          | 2,299 \$          | 2,299 \$          | 2,299 \$          | 2,299 \$          | 2,299 \$          | 2,299 \$          | 2,299 \$          | 2,299 \$          | 2,299 \$          | 2,299 \$          |
| Management                            | 30,386 \$         | 24,998 \$         | 25,988 \$         | 25,220 \$         | 25,988 \$         | 25,603 \$         | 29,780 \$         | 24,998 \$         | 25,988 \$         | 25,220 \$         | 26,594 \$         | 24,998 \$         | 26,210 \$         | 24,998 \$         | 25,988 \$         |
| <b>Total Screening</b>                | <b>171,926 \$</b> | <b>130,617 \$</b> | <b>138,213 \$</b> | <b>132,319 \$</b> | <b>138,213 \$</b> | <b>135,258 \$</b> | <b>167,285 \$</b> | <b>130,617 \$</b> | <b>138,213 \$</b> | <b>132,319 \$</b> | <b>142,854 \$</b> | <b>130,617 \$</b> | <b>139,915 \$</b> | <b>130,617 \$</b> | <b>138,213 \$</b> |
| Cost per person screened              | 2.60 \$           | 1.98 \$           | 2.09 \$           | 2.00 \$           | 2.09 \$           | 2.05 \$           | 2.53 \$           | 1.98 \$           | 2.09 \$           | 2.00 \$           | 2.16 \$           | 1.98 \$           | 2.12 \$           | 1.98 \$           | 2.09 \$           |
| Cost per person case detected         | 26,120 \$         | 19,844 \$         | 20,998 \$         | 20,102 \$         | 20,998 \$         | 20,549 \$         | 25,414 \$         | 19,844 \$         | 20,998 \$         | 20,102 \$         | 21,703 \$         | 19,844 \$         | 21,256 \$         | 19,844 \$         | 20,998 \$         |

| Assumptions                                                    |        |
|----------------------------------------------------------------|--------|
| People screened                                                | 66,000 |
| Prevalence                                                     | 0.013% |
| Sensitivity CATT                                               | 0.953  |
| Specificity CATT                                               | 0.948  |
| Sensitivity algorithm PG-CTC-mAECT                             | 0.903  |
| Sensitivity algorithm PG-mAECT                                 | 0.805  |
| % of CATT discarded Traditional Team                           | 7.5%   |
| % of CATT discarded Mini Team                                  | 15%    |
| Number of cases                                                | 9      |
| Number of confirmations                                        | 3,440  |
| Number of cases identified by traditional team (LNA_CTC_mAECT) | 7.4    |
| Number of cases identified mini team (LNA-mAECT)               | 6.6    |

#### 4. Scenario analysis: Baseline scenario

Table 15 Scenario analysis

| Assumptions                                                  | Baseline                  |
|--------------------------------------------------------------|---------------------------|
| Population screened per year per team                        | 66,000                    |
| Prevalence                                                   | 0.011%                    |
| Number of cases                                              | 9                         |
| Sensitivity CATT                                             | 0.953                     |
| Specificity CATT                                             | 1.05% CATT tests positive |
| Number of confirmations                                      | 3,440                     |
| Sensitivity algorithm PG-CTC-mAECT (Traditional team)        | 0.903                     |
| Sensitivity algorithm PG-mAECT (Mini team)                   | 0.805                     |
| Number of cases identified: LNA-mAECT (Mini Team)            | 6.6                       |
| Number of cases identified: LNA CTC mAECT (Traditional team) | 7.4                       |
| % of CATT discarded Traditional Team                         | 8%                        |
| % of CATT discarded Mini Team                                | 15%                       |
| % of RDT discarded Traditional & Mini Team                   | 5%                        |
| Non-specific => All CATT or RDT                              | 0.02 \$                   |
| CATT                                                         | 0.74 \$                   |
| Lymph node aspiration (LNA)                                  | 0.25 \$                   |
| Blood sample (BS)                                            | 1.28 \$                   |
| CTC                                                          | 1.77 \$                   |
| mAECT                                                        | 4.13 \$                   |
| Lumbar puncture examination (LP)                             | 18.89 \$                  |
| CATT titration                                               | 3.52 \$                   |

|                                                                  | Traditional Team |              | Mini team      |              | Impact price per person screened |              |
|------------------------------------------------------------------|------------------|--------------|----------------|--------------|----------------------------------|--------------|
|                                                                  |                  |              |                |              |                                  |              |
| <b>Capital Equipment</b>                                         | <b>10,782</b>    | <b>7.6%</b>  | <b>8,582</b>   | <b>7.0%</b>  | <b>0.03</b>                      | <b>11.6%</b> |
| <b>Annual Recurrent costs</b>                                    | <b>130,751</b>   | <b>92.4%</b> | <b>114,039</b> | <b>93.0%</b> | <b>0.25</b>                      | <b>88.4%</b> |
| Lab & medical supplies - Screening tests (CATT & Discarded CATT) | 61,922           | 44.8%        | 61,849         | 50.4%        | 0.00                             | 0.4%         |
| Lab & medical supplies - Parasitological confirmation            | 54,253           | 38.3%        | 57,934         | 47.2%        | -0.06                            | -19.5%       |
| Lab & medical supplies - Staging                                 | 5,140            | 3.6%         | 3,915          | 3.2%         | 0.02                             | 6.5%         |
| Lab & medical supplies - Surveillance                            | 114              | 0.1%         | -              | 0.0%         | 0.00                             | 0.6%         |
| Human Resources                                                  | 2,415            | 1.7%         | -              | 0.0%         | 0.04                             | 12.8%        |
| Other supplies and materials                                     | 5,615            | 4.0%         | 5,045          | 4.1%         | 0.01                             | 3.0%         |
| Fuel cost                                                        | 5,719            | 4.0%         | 2,299          | 1.9%         | 0.05                             | 18.1%        |
| Management                                                       | 26,421           | 18.7%        | 23,955         | 19.5%        | 0.04                             | 13.0%        |
| <b>Total Screening</b>                                           | <b>141,533</b>   | <b>100%</b>  | <b>122,621</b> | <b>100%</b>  |                                  |              |
| Cost per person screened                                         | 2.14             |              | 1.86           |              | 0.29                             | 15.4%        |
| Cost per person case detected                                    | 23,551           |              | 22,888         |              | 663                              | 2.9%         |

## 5. Scenario analysis: Sensitivity analysis

Table 16 Sensitivity analysis: Diagnostic algorithm excluding CATT titration & CTC

| Assumptions                                                                                         | Baseline | Parameter variation |
|-----------------------------------------------------------------------------------------------------|----------|---------------------|
| Sensitivity algorithm PG-CTC-mAECT (Traditional team)                                               | 0.903    | 0.805               |
| No cost included for CTC (all parasitological confirmations)                                        | 1.77 \$  |                     |
| No cost included for CATT titration (all HAT suspects that tested negative on HAT microscopy tests) | 3.52 \$  |                     |

|                                                                  | Diagnostic algorithm excluding CATT dilution & CTC |             |                   |             |
|------------------------------------------------------------------|----------------------------------------------------|-------------|-------------------|-------------|
|                                                                  | Traditional Team                                   |             | Mini Team         |             |
| <b>Capital Equipment</b>                                         | 10,782 \$                                          | 7.9%        | 8,582 \$          | 7.0%        |
| <b>Annual Recurrent costs</b>                                    | 126,565 \$                                         | 92.1%       | 114,039 \$        | 93.0%       |
| Lab & medical supplies - Screening tests (CATT & Discarded CATT) | 54,253 \$                                          | 39.5%       | 57,934 \$         | 47.2%       |
| Lab & medical supplies - Parasitological confirmation            | 3,915 \$                                           | 2.9%        | 3,915 \$          | 3.2%        |
| Lab & medical supplies - Staging                                 | 114 \$                                             | 0.1%        | 0 \$              | 0.0%        |
| Lab & medical supplies - Surveillance                            | 0 \$                                               | 0.0%        | 0 \$              | 0.0%        |
| Human Resources                                                  | 31,074 \$                                          | 22.6%       | 20,892 \$         | 17.0%       |
| Other supplies and materials                                     | 5,615 \$                                           | 4.1%        | 5,045 \$          | 4.1%        |
| Fuel cost                                                        | 5,719 \$                                           | 4.2%        | 2,299 \$          | 1.9%        |
| Management                                                       | 25,875 \$                                          | 18.8%       | 23,955 \$         | 19.5%       |
| <b>Total Screening</b>                                           | <b>137,347 \$</b>                                  | <b>100%</b> | <b>122,621 \$</b> | <b>100%</b> |
| Cost per person screened                                         | 2.08 \$                                            |             | 1.86 \$           |             |
| Cost per person case detected                                    | 25,637 \$                                          |             | 22,888 \$         |             |

Table 17 Sensitivity analysis: Discount rate 5% - 0%

| Assumptions | Baseline | Parameter variation |
|-------------|----------|---------------------|
|             | 3%       | 5% 0%               |

|                                                                  | Discount rate: 5% |             |                   |             | Discount rate: 0% |             |                   |             |
|------------------------------------------------------------------|-------------------|-------------|-------------------|-------------|-------------------|-------------|-------------------|-------------|
|                                                                  | Traditional Team  |             | Mini Team         |             | Traditional Team  |             | Mini Team         |             |
| <b>Capital Equipment</b>                                         | 10,411 \$         | 7.4%        | 8,330 \$          | 6.8%        | 11,406 \$         | 8.0%        | 8,756 \$          | 7.1%        |
| <b>Annual Recurrent costs</b>                                    | 130,720 \$        | 92.6%       | 114,001 \$        | 93.2%       | 130,869 \$        | 92.0%       | 114,065 \$        | 92.9%       |
| Lab & medical supplies - Screening tests (CATT & Discarded CATT) | 54,253 \$         | 38.4%       | 57,934 \$         | 47.4%       | 54,253 \$         | 38.1%       | 57,934 \$         | 47.2%       |
| Lab & medical supplies - Parasitological confirmation            | 5,140 \$          | 3.6%        | 3,915 \$          | 3.2%        | 5,140 \$          | 3.6%        | 3,915 \$          | 3.2%        |
| Lab & medical supplies - Staging                                 | 139 \$            | 0.1%        | 0 \$              | 0.0%        | 139 \$            | 0.1%        | 0 \$              | 0.0%        |
| Lab & medical supplies - Surveillance                            | 2,410 \$          | 1.7%        | 0 \$              | 0.0%        | 2,410 \$          | 1.7%        | 0 \$              | 0.0%        |
| Human Resources                                                  | 31,074 \$         | 22.0%       | 20,892 \$         | 17.1%       | 31,074 \$         | 21.8%       | 20,892 \$         | 17.0%       |
| Other supplies and materials                                     | 5,615 \$          | 4.0%        | 5,045 \$          | 4.1%        | 5,615 \$          | 3.9%        | 5,045 \$          | 4.1%        |
| Fuel cost                                                        | 5,719 \$          | 4.1%        | 2,299 \$          | 1.9%        | 5,719 \$          | 4.0%        | 2,299 \$          | 1.9%        |
| Management                                                       | 26,369 \$         | 18.7%       | 23,917 \$         | 19.6%       | 26,518 \$         | 18.6%       | 23,981 \$         | 19.5%       |
| <b>Total Screening</b>                                           | <b>141,130 \$</b> | <b>100%</b> | <b>122,330 \$</b> | <b>100%</b> | <b>142,275 \$</b> | <b>100%</b> | <b>122,820 \$</b> | <b>100%</b> |
| Cost per person screened                                         | 2.14 \$           |             | 1.85 \$           |             | 2.16 \$           |             | 1.86 \$           |             |
| Cost per person case detected                                    | 19,114 \$         |             | 18,585 \$         |             | 19,269 \$         |             | 18,659 \$         |             |

Table 18 Sensitivity analysis: HAT Prevalence 0.005 % - 0.030%

| Assumptions | Baseline | Parameter variation |        |
|-------------|----------|---------------------|--------|
|             |          | 0.005%              | 0.030% |
| Prevalence  | 0.011%   | 0.005%              | 0.030% |

|                                                                  | Prevalence – 0.005% |              |                   |              | Prevalence - 0.030% |              |                   |              |
|------------------------------------------------------------------|---------------------|--------------|-------------------|--------------|---------------------|--------------|-------------------|--------------|
|                                                                  | Traditional Team    |              | Mini Team         |              | Traditional Team    |              | Mini Team         |              |
| <b>Capital Equipment</b>                                         | <b>10,782 \$</b>    | <b>7.6%</b>  | <b>8,582 \$</b>   | <b>7.0%</b>  | <b>10,782 \$</b>    | <b>7.3%</b>  | <b>8,582 \$</b>   | <b>6.6%</b>  |
| <b>Annual Recurrent costs</b>                                    | <b>130,695 \$</b>   | <b>92.4%</b> | <b>114,039 \$</b> | <b>93.0%</b> | <b>137,712 \$</b>   | <b>92.7%</b> | <b>120,805 \$</b> | <b>93.4%</b> |
| Lab & medical supplies - Screening tests (CATT & Discarded CATT) | 54,253 \$           | 38.3%        | 57,934 \$         | 47.2%        | 54,253 \$           | 36.5%        | 57,934 \$         | 44.8%        |
| Lab & medical supplies - Parasitological confirmation            | 5,140 \$            | 3.6%         | 3,915 \$          | 3.2%         | 5,140 \$            | 3.5%         | 3,915 \$          | 3.0%         |
| Lab & medical supplies - Staging                                 | 54 \$               | 0.0%         | 0 \$              | 0.0%         | 322 \$              | 0.2%         | 0 \$              | 0.0%         |
| Lab & medical supplies - Surveillance                            | 2,426 \$            | 1.7%         | 0 \$              | 0.0%         | 2,376 \$            | 1.6%         | 0 \$              | 0.0%         |
| Human Resources                                                  | 31,074 \$           | 22.0%        | 20,892 \$         | 17.0%        | 31,074 \$           | 20.9%        | 20,892 \$         | 16.1%        |
| Other supplies and materials                                     | 5,615 \$            | 4.0%         | 5,045 \$          | 4.1%         | 5,615 \$            | 3.8%         | 5,045 \$          | 3.9%         |
| Fuel cost                                                        | 5,719 \$            | 4.0%         | 2,299 \$          | 1.9%         | 5,719 \$            | 3.9%         | 2,299 \$          | 1.8%         |
| Management                                                       | 26,414 \$           | 18.7%        | 23,955 \$         | 19.5%        | 33,213 \$           | 22.4%        | 30,721 \$         | 23.7%        |
| <b>Total Screening</b>                                           | <b>141,477 \$</b>   | <b>100%</b>  | <b>122,621 \$</b> | <b>100%</b>  | <b>148,494 \$</b>   | <b>100%</b>  | <b>129,388 \$</b> | <b>100%</b>  |
| Cost per person screened                                         | 2.14 \$             |              | 1.86 \$           |              | 2.25 \$             |              | 1.96 \$           |              |
| Cost per person case detected                                    | 49,818 \$           |              | 48,435 \$         |              | 8,715 \$            |              | 8,518 \$          |              |

Table 19 Sensitivity analysis: Fuel cost 75% - 150% initial cost

| Assumptions                | Baseline | Parameter variation |      |
|----------------------------|----------|---------------------|------|
|                            |          | - 25%               | +50% |
| Fuel cost Traditional team | 5,719 \$ | - 25%               | +50% |
| Fuel cost Mini Team        | 2,299 \$ | - 25%               | +50% |

|                                                                  | Fuel cost – 25%   |              |                   |              | Fuel cost + 50%   |              |                   |              |
|------------------------------------------------------------------|-------------------|--------------|-------------------|--------------|-------------------|--------------|-------------------|--------------|
|                                                                  | Traditional Team  |              | Mini Team         |              | Traditional Team  |              | Mini Team         |              |
| <b>Capital Equipment</b>                                         | <b>10,782 \$</b>  | <b>7.7%</b>  | <b>8,582 \$</b>   | <b>7.0%</b>  | <b>10,782 \$</b>  | <b>7.4%</b>  | <b>8,582 \$</b>   | <b>6.9%</b>  |
| <b>Annual Recurrent costs</b>                                    | <b>129,107 \$</b> | <b>92.3%</b> | <b>113,378 \$</b> | <b>93.0%</b> | <b>134,039 \$</b> | <b>92.6%</b> | <b>115,360 \$</b> | <b>93.1%</b> |
| Lab & medical supplies - Screening tests (CATT & Discarded CATT) | 54,253 \$         | 38.8%        | 57,934 \$         | 47.5%        | 54,253 \$         | 37.5%        | 57,934 \$         | 46.7%        |
| Lab & medical supplies - Parasitological confirmation            | 5,140 \$          | 3.7%         | 3,915 \$          | 3.2%         | 5,140 \$          | 3.5%         | 3,915 \$          | 3.2%         |
| Lab & medical supplies - Staging                                 | 114 \$            | 0.1%         | 0 \$              | 0.0%         | 114 \$            | 0.1%         | 0 \$              | 0.0%         |
| Lab & medical supplies - Surveillance                            | 2,415 \$          | 1.7%         | 0 \$              | 0.0%         | 2,415 \$          | 1.7%         | 0 \$              | 0.0%         |
| Human Resources                                                  | 31,074 \$         | 22.2%        | 20,892 \$         | 17.1%        | 31,074 \$         | 21.5%        | 20,892 \$         | 16.9%        |
| Other supplies and materials                                     | 5,615 \$          | 4.0%         | 5,045 \$          | 4.1%         | 5,615 \$          | 3.9%         | 5,045 \$          | 4.1%         |
| Fuel cost                                                        | 4,289 \$          | 3.1%         | 1,724 \$          | 1.4%         | 8,578 \$          | 5.9%         | 3,448 \$          | 2.8%         |
| Management                                                       | 26,207 \$         | 18.7%        | 23,869 \$         | 19.6%        | 26,850 \$         | 18.5%        | 24,127 \$         | 19.5%        |
| <b>Total Screening</b>                                           | <b>139,888 \$</b> | <b>100%</b>  | <b>121,960 \$</b> | <b>100%</b>  | <b>144,821 \$</b> | <b>100%</b>  | <b>123,943 \$</b> | <b>100%</b>  |
| Cost per person screened                                         | 2.12 \$           |              | 1.85 \$           |              | 2.19 \$           |              | 1.88 \$           |              |
| Cost per person case detected                                    | 23,278 \$         |              | 22,765 \$         |              | 24,098 \$         |              | 23,135 \$         |              |

Table 20 Sensitivity analysis: Vehicle/Motorcycle use life

| Assumptions         | Baseline | Parameter variation |   |
|---------------------|----------|---------------------|---|
| Use life vehicle    | 7        | 10                  | 3 |
| Use life motorcycle | 5.6      | 10                  | 2 |

|                                                                  | Vehicle/Motorcycle use life – 10/10 |              |                   |              | Vehicle/Motorcycle use life – 3/2 |              |                   |              |
|------------------------------------------------------------------|-------------------------------------|--------------|-------------------|--------------|-----------------------------------|--------------|-------------------|--------------|
|                                                                  | Traditional Team                    |              | Mini Team         |              | Traditional Team                  |              | Mini Team         |              |
| <b>Capital Equipment</b>                                         | <b>9,121 \$</b>                     | <b>6.5%</b>  | <b>6,762 \$</b>   | <b>5.6%</b>  | <b>18,161 \$</b>                  | <b>12.1%</b> | <b>16,282 \$</b>  | <b>10.9%</b> |
| <b>Annual Recurrent costs</b>                                    | <b>130,502 \$</b>                   | <b>93.5%</b> | <b>113,766 \$</b> | <b>94.4%</b> | <b>131,858 \$</b>                 | <b>87.9%</b> | <b>115,194 \$</b> | <b>89.1%</b> |
| Lab & medical supplies - Screening tests (CATT & Discarded CATT) | 54,253 \$                           | 38.9%        | 57,934 \$         | 48.1%        | 54,253 \$                         | 36.2%        | 57,934 \$         | 38.8%        |
| Lab & medical supplies - Parasitological confirmation            | 5,140 \$                            | 3.7%         | 3,915 \$          | 3.2%         | 5,140 \$                          | 3.4%         | 3,915 \$          | 13.0%        |
| Lab & medical supplies - Staging                                 | 114 \$                              | 0.1%         | 0 \$              | 0.0%         | 114 \$                            | 0.1%         | 0 \$              | 0.0%         |
| Lab & medical supplies - Surveillance                            | 2,415 \$                            | 1.7%         | 0 \$              | 0.0%         | 2,415 \$                          | 1.6%         | 0 \$              | 0.0%         |
| Human Resources                                                  | 31,074 \$                           | 22.3%        | 20,892 \$         | 17.3%        | 31,074 \$                         | 20.7%        | 20,892 \$         | 14.0%        |
| Other supplies and materials                                     | 5,615 \$                            | 4.0%         | 5,045 \$          | 4.2%         | 5,615 \$                          | 3.7%         | 5,045 \$          | 3.4%         |
| Fuel cost                                                        | 5,719 \$                            | 4.1%         | 2,299 \$          | 1.9%         | 5,719 \$                          | 3.8%         | 2,299 \$          | 1.5%         |
| Management                                                       | 26,172 \$                           | 18.7%        | 23,682 \$         | 19.6%        | 27,528 \$                         | 18.3%        | 25,110 \$         | 18.4%        |
| <b>Total Screening</b>                                           | <b>139,623 \$</b>                   | <b>100%</b>  | <b>120,528 \$</b> | <b>100%</b>  | <b>150,019 \$</b>                 | <b>100%</b>  | <b>131,476 \$</b> | <b>100%</b>  |
| Cost per person screened                                         | 2.12 \$                             |              | 1.83 \$           |              | 2.27 \$                           |              | 1.99 \$           |              |
| Cost per person case detected                                    | 23,233 \$                           |              | 22,498 \$         |              | 24,963 \$                         |              | 24,541 \$         |              |

Table 21 Sensitivity analysis: Cost mAECT donated 0\$ - 8.26\$

| Assumptions | Baseline | Parameter variation |         |
|-------------|----------|---------------------|---------|
| mAECT       | 4.13 \$  | 0 \$                | 8.26 \$ |

|                                                                  | mAECT donated – 0 \$ |              |                   |              | mAECT gel no longer donated – 8.26 \$ |              |                   |              |
|------------------------------------------------------------------|----------------------|--------------|-------------------|--------------|---------------------------------------|--------------|-------------------|--------------|
|                                                                  | Traditional Team     |              | Mini Team         |              | Traditional Team                      |              | Mini Team         |              |
| <b>Capital Equipment</b>                                         | <b>10,782 \$</b>     | <b>7.8%</b>  | <b>8,582 \$</b>   | <b>7.2%</b>  | <b>10,782 \$</b>                      | <b>7.4%</b>  | <b>8,582 \$</b>   | <b>6.8%</b>  |
| <b>Annual Recurrent costs</b>                                    | <b>127,463 \$</b>    | <b>92.2%</b> | <b>110,751 \$</b> | <b>92.8%</b> | <b>134,039 \$</b>                     | <b>92.6%</b> | <b>117,327 \$</b> | <b>93.2%</b> |
| Lab & medical supplies - Screening tests (CATT & Discarded CATT) | 54,253 \$            | 39.2%        | 57,934 \$         | 48.5%        | 54,253 \$                             | 37.5%        | 57,934 \$         | 46.0%        |
| Lab & medical supplies - Parasitological confirmation            | 2,281 \$             | 1.6%         | 1,056 \$          | 0.9%         | 7,999 \$                              | 5.5%         | 6,774 \$          | 5.4%         |
| Lab & medical supplies - Staging                                 | 114 \$               | 0.1%         | 0 \$              | 0.0%         | 114 \$                                | 0.1%         | 0 \$              | 0.0%         |
| Lab & medical supplies - Surveillance                            | 2,415 \$             | 1.7%         | 0 \$              | 0.0%         | 2,415 \$                              | 1.7%         | 0 \$              | 0.0%         |
| Human Resources                                                  | 31,074 \$            | 22.5%        | 20,892 \$         | 17.5%        | 31,074 \$                             | 21.5%        | 20,892 \$         | 16.6%        |
| Other supplies and materials                                     | 5,615 \$             | 4.1%         | 5,045 \$          | 4.2%         | 5,615 \$                              | 3.9%         | 5,045 \$          | 4.0%         |
| Fuel cost                                                        | 5,719 \$             | 4.1%         | 2,299 \$          | 1.9%         | 5,719 \$                              | 3.9%         | 2,299 \$          | 1.8%         |
| Management                                                       | 25,993 \$            | 18.8%        | 23,526 \$         | 19.7%        | 26,850 \$                             | 18.5%        | 24,384 \$         | 19.4%        |
| <b>Total Screening</b>                                           | <b>138,245 \$</b>    | <b>100%</b>  | <b>119,333 \$</b> | <b>100%</b>  | <b>144,821 \$</b>                     | <b>100%</b>  | <b>125,909 \$</b> | <b>100%</b>  |
| Cost per person screened                                         | 2.09 \$              |              | 1.81 \$           |              | 2.19 \$                               |              | 1.91 \$           |              |
| Cost per person case detected                                    | 23,004 \$            |              | 22,275 \$         |              | 24,098 \$                             |              | 23,502 \$         |              |

Table 22 Sensitivity analysis: Population screened per year per team

| Assumptions                           | Baseline | Parameter variation |        |
|---------------------------------------|----------|---------------------|--------|
|                                       |          | 72,000              | 54,000 |
| Population screened per year per team | 66,000   | 72,000              | 54,000 |

|                                                                  | Population screened per year per team – 72,000 |              |                   |              | Population screened per year per team – 54,000 |              |                   |              |
|------------------------------------------------------------------|------------------------------------------------|--------------|-------------------|--------------|------------------------------------------------|--------------|-------------------|--------------|
|                                                                  | Traditional Team                               |              | Mini Team         |              | Traditional Team                               |              | Mini Team         |              |
|                                                                  |                                                |              |                   |              |                                                |              |                   |              |
| <b>Capital Equipment</b>                                         | <b>10,782 \$</b>                               | <b>7.3%</b>  | <b>8,582 \$</b>   | <b>6.6%</b>  | <b>10,782 \$</b>                               | <b>8.4%</b>  | <b>8,582 \$</b>   | <b>7.8%</b>  |
| <b>Annual Recurrent costs</b>                                    | <b>137,225 \$</b>                              | <b>92.7%</b> | <b>120,505 \$</b> | <b>93.4%</b> | <b>117,804 \$</b>                              | <b>91.6%</b> | <b>101,107 \$</b> | <b>92.2%</b> |
| Lab & medical supplies - Screening tests (CATT & Discarded CATT) | 59,185 \$                                      | 40.0%        | 63,200 \$         | 49.0%        | 44,389 \$                                      | 34.5%        | 47,400 \$         | 43.2%        |
| Lab & medical supplies - Parasitological confirmation            | 5,607 \$                                       | 3.8%         | 4,271 \$          | 3.3%         | 4,205 \$                                       | 3.3%         | 3,203 \$          | 2.9%         |
| Lab & medical supplies - Staging                                 | 124 \$                                         | 0.1%         | 0 \$              | 0.0%         | 93 \$                                          | 0.1%         | 0 \$              | 0.0%         |
| Lab & medical supplies - Surveillance                            | 2,635 \$                                       | 1.8%         | 0 \$              | 0.0%         | 1,976 \$                                       | 1.5%         | 0 \$              | 0.0%         |
| Human Resources                                                  | 31,074 \$                                      | 21.0%        | 20,892 \$         | 16.2%        | 31,074 \$                                      | 24.2%        | 20,892 \$         | 19.0%        |
| Other supplies and materials                                     | 5,615 \$                                       | 3.8%         | 5,045 \$          | 3.9%         | 5,615 \$                                       | 4.4%         | 5,045 \$          | 4.6%         |
| Fuel cost                                                        | 5,719 \$                                       | 3.9%         | 2,299 \$          | 1.8%         | 5,719 \$                                       | 4.4%         | 2,299 \$          | 2.1%         |
| Management                                                       | 27,266 \$                                      | 18.4%        | 24,798 \$         | 19.2%        | 24,733 \$                                      | 19.2%        | 22,268 \$         | 20.3%        |
| <b>Total Screening</b>                                           | <b>148,006 \$</b>                              | <b>100%</b>  | <b>129,087 \$</b> | <b>100%</b>  | <b>128,585 \$</b>                              | <b>100%</b>  | <b>109,689 \$</b> | <b>100%</b>  |
| Cost per person screened                                         | 2.06 \$                                        |              | 1.79 \$           |              | 2.38 \$                                        |              | 2.03 \$           |              |
| Cost per person case detected                                    | 22,576 \$                                      |              | 22,087 \$         |              | 26,152 \$                                      |              | 25,024 \$         |              |

Table 23 Sensitivity analysis: Specificity CATT

| Assumptions      | Baseline | Parameter variation |       |
|------------------|----------|---------------------|-------|
|                  |          | 0.993               | 0.835 |
| Specificity CATT | 0.948    | 0.993               | 0.835 |

|                                                                  | Specificity CATT – 0.993 |              |                   |              | Specificity CATT – 0.835 |              |                   |              |
|------------------------------------------------------------------|--------------------------|--------------|-------------------|--------------|--------------------------|--------------|-------------------|--------------|
|                                                                  | Traditional Team         |              | Mini Team         |              | Traditional Team         |              | Mini Team         |              |
|                                                                  |                          |              |                   |              |                          |              |                   |              |
| <b>Capital Equipment</b>                                         | <b>10,782 \$</b>         | <b>7.8%</b>  | <b>8,582 \$</b>   | <b>7.1%</b>  | <b>10,782 \$</b>         | <b>4.0%</b>  | <b>8,582 \$</b>   | <b>4.5%</b>  |
| <b>Annual Recurrent costs</b>                                    | <b>127,935 \$</b>        | <b>92.2%</b> | <b>112,584 \$</b> | <b>92.9%</b> | <b>259,148 \$</b>        | <b>96.0%</b> | <b>180,388 \$</b> | <b>95.5%</b> |
| Lab & medical supplies - Screening tests (CATT & Discarded CATT) | 54,253 \$                | 39.1%        | 57,934 \$         | 47.8%        | 54,253 \$                | 20.1%        | 57,934 \$         | 30.7%        |
| Lab & medical supplies - Parasitological confirmation            | 3,479 \$                 | 2.5%         | 2,650 \$          | 2.2%         | 80,887 \$                | 30.0%        | 61,610 \$         | 32.6%        |
| Lab & medical supplies - Staging                                 | 114 \$                   | 0.1%         | 0 \$              | 0.0%         | 114 \$                   | 0.0%         | 0 \$              | 0.0%         |
| Lab & medical supplies - Surveillance                            | 1,628 \$                 | 1.2%         | 0 \$              | 0.0%         | 38,318 \$                | 14.2%        | 0 \$              | 0.0%         |
| Human Resources                                                  | 31,074 \$                | 22.4%        | 20,892 \$         | 17.2%        | 31,074 \$                | 11.5%        | 20,892 \$         | 11.1%        |
| Other supplies and materials                                     | 5,615 \$                 | 4.0%         | 5,045 \$          | 4.2%         | 5,615 \$                 | 2.1%         | 5,045 \$          | 2.7%         |
| Fuel cost                                                        | 5,719 \$                 | 4.1%         | 2,299 \$          | 1.9%         | 5,719 \$                 | 2.1%         | 2,299 \$          | 1.2%         |
| Management                                                       | 26,054 \$                | 18.8%        | 23,765 \$         | 19.6%        | 43,169 \$                | 16.0%        | 32,609 \$         | 17.3%        |
| <b>Total Screening</b>                                           | <b>138,717 \$</b>        | <b>100%</b>  | <b>121,166 \$</b> | <b>100%</b>  | <b>269,930 \$</b>        | <b>100%</b>  | <b>188,970 \$</b> | <b>100%</b>  |
| Cost per person screened                                         | 2.10 \$                  |              | 1.84 \$           |              | 4.09 \$                  |              | 2.86 \$           |              |
| Cost per person case detected                                    | 23,083 \$                |              | 22,617 \$         |              | 44,917 \$                |              | 35,273 \$         |              |

Table 24 Sensitivity analysis: Serological test - SD Bioline HAT

| Assumptions                                    | Baseline | Parameter variation |  |
|------------------------------------------------|----------|---------------------|--|
| Cost serological test                          | 0.74 \$  | 0.60 \$             |  |
| Specificity serological test                   | 0.948    | 0.879               |  |
| % Discarded serological tests traditional team | 8%       | 5%                  |  |
| % Discarded serological tests mini team        | 15%      | 5%                  |  |

|                                                                     | Serological test – SD Bioline HAT |              |                   |              |
|---------------------------------------------------------------------|-----------------------------------|--------------|-------------------|--------------|
|                                                                     | Traditional Team                  |              | Mini Team         |              |
| <b>Capital Equipment</b>                                            | <b>10,782 \$</b>                  | <b>4.9%</b>  | <b>8,582 \$</b>   | <b>5.6%</b>  |
| <b>Annual Recurrent costs</b>                                       | <b>209,984 \$</b>                 | <b>95.1%</b> | <b>144,647 \$</b> | <b>94.4%</b> |
| Lab & medical supplies - Screening tests (included discarded tests) | 43,272 \$                         | 19.6%        | 43,272 \$         | 28.2%        |
| Lab & medical supplies - Parasitological confirmation               | 59,333 \$                         | 26.9%        | 45,192 \$         | 29.5%        |
| Lab & medical supplies - Staging                                    | 114 \$                            | 0.1%         | 0 \$              | 0.0%         |
| Lab & medical supplies - Surveillance                               | 28,101 \$                         | 12.7%        | 0 \$              | 0.0%         |
| Human Resources                                                     | 31,074 \$                         | 14.1%        | 20,892 \$         | 13.6%        |
| Other supplies and materials                                        | 5,615 \$                          | 2.5%         | 5,045 \$          | 3.3%         |
| Fuel cost                                                           | 5,719 \$                          | 2.6%         | 2,299 \$          | 1.5%         |
| Management                                                          | 36,756 \$                         | 16.6%        | 27,947 \$         | 18.2%        |
| <b>Total Screening</b>                                              | <b>220,765 \$</b>                 | <b>100%</b>  | <b>153,229 \$</b> | <b>100%</b>  |
| Cost per person screened                                            | 3.34 \$                           |              | 2.32 \$           |              |
| Cost per person case detected                                       | 36,736 \$                         |              | 28,602 \$         |              |

Table 25 Sensitivity analysis: Serological test - HAT Sero-K-Set

| Assumptions                                    | Baseline | Parameter variation |  |
|------------------------------------------------|----------|---------------------|--|
| Cost serological test                          | 0.74 \$  | 0.60 \$             |  |
| Specificity serological test                   | 0.948    | 0.879               |  |
| % Discarded serological tests traditional team | 8%       | 5%                  |  |
| % Discarded serological tests mini team        | 15%      | 5%                  |  |

|                                                                     | Serological test – HAT Sero-K-Set |              |                   |              |
|---------------------------------------------------------------------|-----------------------------------|--------------|-------------------|--------------|
|                                                                     | Traditional Team                  |              | Mini Team         |              |
| <b>Capital Equipment</b>                                            | <b>10,782 \$</b>                  | <b>3.3%</b>  | <b>8,582 \$</b>   | <b>3.3%</b>  |
| <b>Annual Recurrent costs</b>                                       | <b>315,841 \$</b>                 | <b>96.7%</b> | <b>252,109 \$</b> | <b>96.7%</b> |
| Lab & medical supplies - Screening tests (included discarded tests) | 138,211 \$                        | 42.3%        | 138,211 \$        | 53.0%        |
| Lab & medical supplies - Parasitological confirmation               | 57,373 \$                         | 17.6%        | 43,699 \$         | 16.8%        |
| Lab & medical supplies - Staging                                    | 114 \$                            | 0.0%         | 0 \$              | 0.0%         |
| Lab & medical supplies - Surveillance                               | 27,172 \$                         | 8.3%         | 0 \$              | 0.0%         |
| Human Resources                                                     | 31,074 \$                         | 9.5%         | 20,892 \$         | 8.0%         |
| Other supplies and materials                                        | 5,615 \$                          | 1.7%         | 5,045 \$          | 1.9%         |
| Fuel cost                                                           | 5,719 \$                          | 1.8%         | 2,299 \$          | 0.9%         |
| Management                                                          | 50,564 \$                         | 15.5%        | 41,964 \$         | 16.1%        |
| <b>Total Screening</b>                                              | <b>326,623 \$</b>                 | <b>100%</b>  | <b>260,692 \$</b> | <b>100%</b>  |
| Cost per person screened                                            | 4.95 \$                           |              | 3.95 \$           |              |
| Cost per person case detected                                       | 54,350 \$                         |              | 48,660 \$         |              |
